# Supplementary material for: Rational design of a new fluorescent ‘ON/OFF’ xanthene dye for phosphate detection in live cells
Source: Royal Society of Chemistry journal article supplement (doi:10.1039/c4ob00951g), 2014-01-01
Supplement: c4ob00951g1.pdf [file c4ob00951g1.pdf]

## SUPPORTING INFORMATION FOR:

### Rational design of a new fluorescent 'ON/OFF' xanthenic dye for phosphate detection in live cells

Ángela Martínez-Peragón,<sup>[a]</sup> Delia Miguel,<sup>[a]</sup> Angel Orte,<sup>[b]</sup> Antonio J. Mota,<sup>[c]</sup> Maria J. Ruedas-Rama,<sup>[b]</sup> José Justicia,<sup>[a]</sup> José M. Álvarez-Pez,<sup>[b]</sup> Juan M. Cuerva,<sup>\*[a]</sup> and Luis Crovetto<sup>\*[b]</sup>

<sup>a</sup>Department of Organic Chemistry, Faculty of Sciences, University of Granada, C. U. Fuentenueva s/n, 18071 Granada, Spain.

<sup>b</sup>Department of Physical Chemistry, Faculty of Pharmacy, University of Granada, Cartuja Campus, 18071 Granada, Spain.

<sup>c</sup> Department of Inorganic Chemistry, University of Granada, C. U. Fuentenueva s/n, 18071 Granada, Spain.

E-mail: [luiscrovetto@ugr.es](mailto:luiscrovetto@ugr.es); [jmCuerva@ugr.es](mailto:jmCuerva@ugr.es)

---

## Index

|                                                                                   |     |
|-----------------------------------------------------------------------------------|-----|
| - <b>Synthesis section.</b> General Information .....                             | S2  |
| - Synthetic procedures .....                                                      | S2  |
| - Copies of <sup>1</sup> H-NMR and <sup>13</sup> C-NMR spectra of <b>GG</b> ..... | S4  |
| - <b>Theoretical section.</b> General Information .....                           | S5  |
| - Cartesian coordinates and thermal parameters of calculated structures .....     | S6  |
| - <b>Photophysics Information</b> .....                                           | S14 |

## SYNTHESIS SECTION: General Information

Deoxygenated solvents and reagents were used for all reactions involving Grignard or lithium reagents. THF was freshly distilled from Na. TLC was performed on aluminium-backed plates coated with silica gel 60 (230-240 mesh) with F254 indicator. The spots were visualized with UV light (254 nm) and/or staining with Ce/Mo reagent or phosphomolybdic acid solution and subsequent heating. Products were purified by flash chromatography on Merck silica gel 50. Yields refer to analytically pure samples.

<sup>1</sup>H NMR spectra were recorded at 300 MHz. Chemical shifts are reported in ppm using residual solvent peak as reference (CHCl<sub>3</sub>: δ 7.26, CH<sub>3</sub>OH: δ 3.34). Data are reported as follows: chemical shift, multiplicity (s: singlet, d: doublet, t: triplet, m: multiplet, dd: doublet of doublets, dt: doublet of triplets, dq: doublet of quartets, td: triplet of doublets), coupling constant (*J* in Hz) and integration. <sup>13</sup>C-NMR spectra were recorded at 75.4 MHz using broadband proton decoupling and chemical shifts are reported in ppm using residual solvent peaks as reference (CDCl<sub>3</sub>: δ 77.16, CD<sub>3</sub>OD: δ 49.86). Carbon multiplicities were assigned by DEPT techniques. <sup>1</sup>H and <sup>13</sup>C NMR of compound **10** matched with previously described.<sup>1</sup> NMR Spectra were measured at room temperature.

High resolution mass spectra (HRMS) were recorded on a Micromass AutoSpec using EI at 70eV.

### Synthetic Procedures.

Compound **1** (GG) was prepared in excellent yield (96 %) using a nucleophilic addition of the corresponding Grignard derivative of aryl bromide **9** to the TBDMS-protected 3,6-dihydroxy-xanthenone **10** and a subsequent dehydration with aqueous hydrochloric acid (Scheme S1).

Synthesis of compounds **8**<sup>2</sup> and **9**<sup>3</sup> was carried out according described protocols and their spectroscopic data matched with previously described.

---

<sup>1</sup> R. L. M. Teeuwen, S. S. van Berkel, T. H. H. van Dulmen, S. Schoffelen, S. A. Meeuwissen, F. A. de Wolf, H. Zuilhof and J. C.M. van Hest, *Chem. Commun*, **2009**, 4022-4024

<sup>2</sup> S. Bhadra, I. W. Dzik, L. J. Goosen, *Angew. Chem. Int. Ed.* **2013**, *52*, 2959-2962.

<sup>3</sup> H. Konishi, K. Aritomi, T. Okano, J. Kiji, *Bull. Chem. Soc. Jpn.* **1989**, *62*, 591-593.

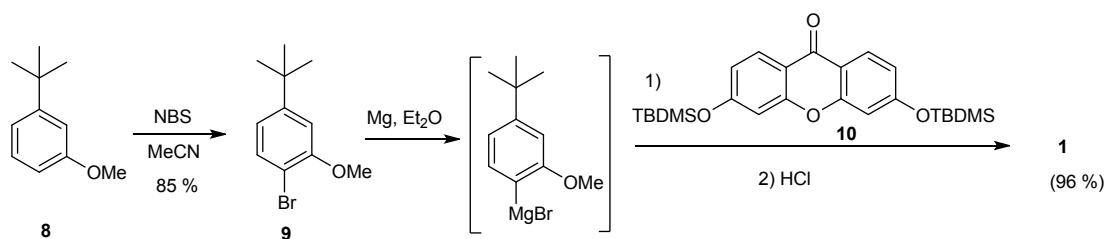

*Scheme S1*

To a solution of compound **10** (1 mmol) in THF (5 mL), the corresponding Grignard compound (5 mmol) was added, and the solution was stirred at room temperature for 2 h. Then, 2N HCl (10 mL) was added and the mixture was stirred for additional 10 min. The resulting solid is filtered and washed with water and diethyl ether, yielding compounds **1** (see Scheme 1). This compound was extensively purified by recrystallization in MeOH to give pure samples of the compound **1**, showing the following spectroscopic data:  $^1\text{H NMR}$  (300 MHz,  $\text{CD}_3\text{OD}$ )  $\delta$  = 7.75 (s, 1H), 7.73 (s, 1H), 7.36 (dd,  $J$  = 4.8 Hz, 4H), 7.32-7.30 (m, 1H), 7.26 (t,  $J$  = 3.5 Hz, 1H), 7.24 (s, 1H), 3.77 (s, 3H), 1.48 (s, 9H);  $^{13}\text{C NMR}$  (75 MHz,  $\text{CD}_3\text{OD}$ ):  $\delta$  = 172.7 (C), 166.8 (C), 161.1 (C), 158.7 (C), 157.9 (C), 135.1 (CH), 131.8 (CH), 121.2 (CH), 119.2 (CH), 118.6 (C), 118.4 (C), 110.3 ( $\text{CH}_2$ ), 103.3 (CH), 56.2 ( $\text{CH}_3$ ), 36.5 (C), 31.6 ( $\text{CH}_3$ ); **HRMS** (EI):  $m/z$  calcd. for  $\text{C}_{24}\text{H}_{22}\text{O}_4$ :  $[\text{M}^+]$  374.1518; found: 374.1524.

Copies of  $^1\text{H}$ -NMR and  $^{13}\text{C}$ -NMR spectra of compound 1

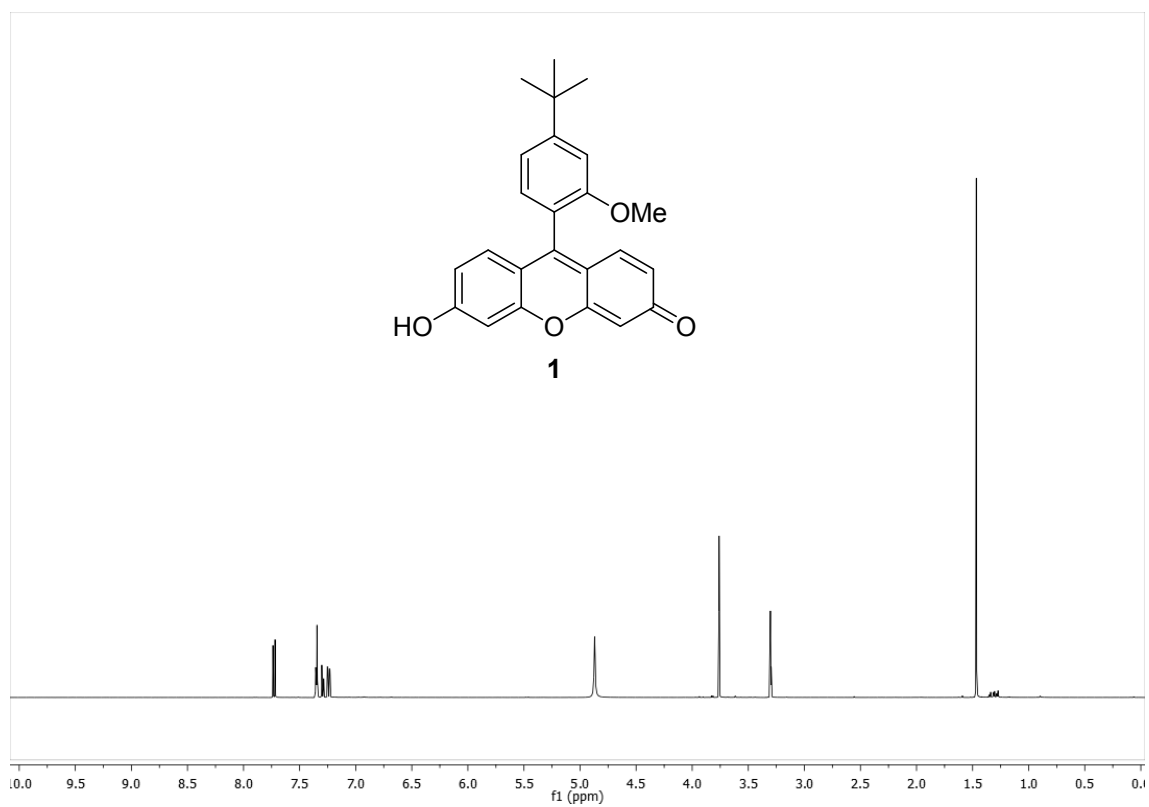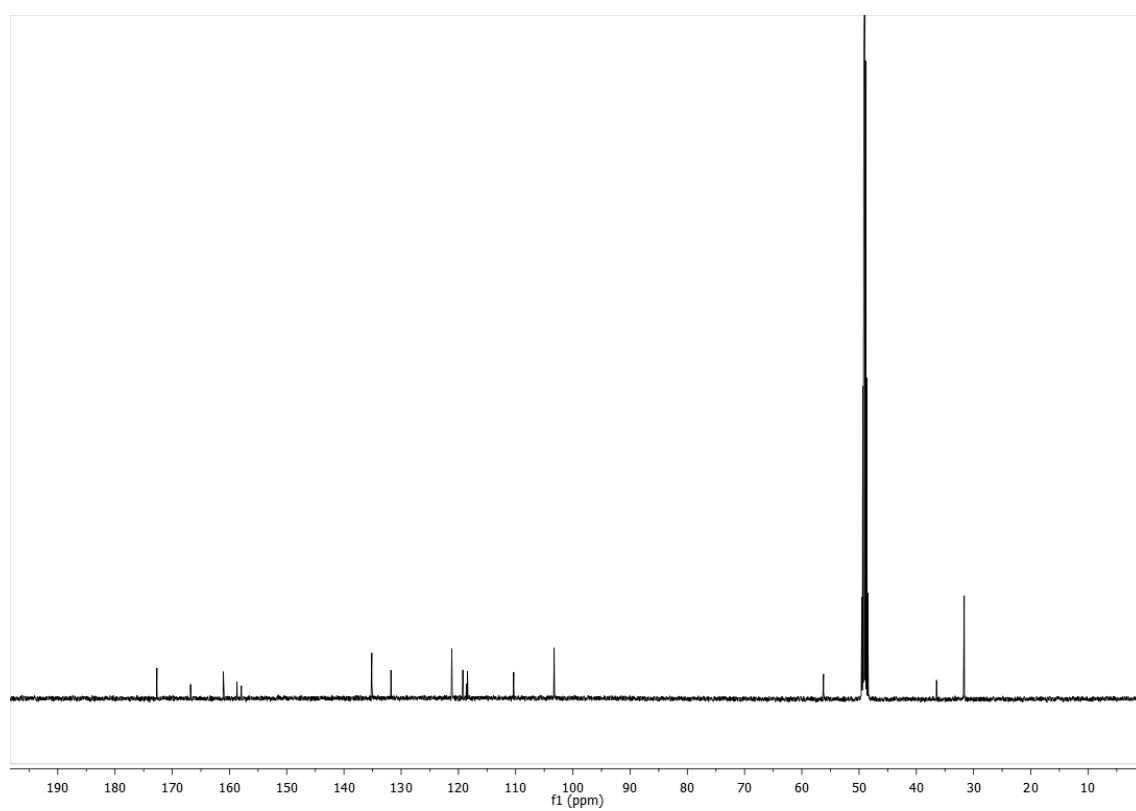

## THEORETICAL SECTION: Generalities

The calculations were carried out at the DFT-B3LYP level<sup>4</sup> with the Gaussian 09 program.<sup>5</sup> The geometries were fully optimized by the gradient technique with 6-31G\* basis set for carbon, oxygen and hydrogen atoms.<sup>6</sup>

The nature of the optimized structures was assessed through a frequency calculation, and the changes of Gibbs free reaction energies ( $\Delta G$  values) were obtained by taking into account zero-point energies, thermal motion, and entropy contribution at standard conditions (temperature of 298.15 K, pressure of 1 atm).

---

<sup>4</sup> (a) Becke, A. D. *Phys. Rev. A* **1988**, *38*, 3098-3100. (b) Lee, C.; Yang, W.; Parr, R. G. *Phys. Rev. B* **1988**, *37*, 785-789. (c) Becke, A. D. *J. Chem. Phys.* **1993**, *98*, 5648-5652.

<sup>5</sup> Gaussian 09, Revision B.01, Frisch, M. J.; Trucks, G. W.; Schlegel, H. B.; Scuseria, G. E.; Robb, M. A.; Cheeseman, J. R.; Scalmani, G.; Barone, V.; Mennucci, B.; Petersson, G. A.; Nakatsuji, H.; Caricato, M.; Li, X.; Hratchian, H. P.; Izmaylov, A. F.; Bloino, J.; Zheng, G.; Sonnenberg, J. L.; Hada, M.; Ehara, M.; Toyota, K.; Fukuda, R.; Hasegawa, J.; Ishida, M.; Nakajima, T.; Honda, Y.; Kitao, O.; Nakai, H.; Vreven, T.; Montgomery, Jr., J. A.; Peralta, J. E.; Ogliaro, F.; Bearpark, M.; Heyd, J. J.; Brothers, E.; Kudin, K. N.; Staroverov, V. N.; Kobayashi, R.; Normand, J.; Raghavachari, K.; Rendell, A.; Burant, J. C.; Iyengar, S. S.; Tomasi, J.; Cossi, M.; Rega, N.; Millam, N. J.; Klene, M.; Knox, J. E.; Cross, J. B.; Bakken, V.; Adamo, C.; Jaramillo, J.; Gomperts, R.; Stratmann, R. E.; Yazyev, O.; Austin, A. J.; Cammi, R.; Pomelli, C.; Ochterski, J. W.; Martin, R. L.; Morokuma, K.; Zakrzewski, V. G.; Voth, G. A.; Salvador, P.; Dannenberg, J. J.; Dapprich, S.; Daniels, A. D.; Farkas, Ö.; Foresman, J. B.; Ortiz, J. V.; Cioslowski, J.; Fox, D. J. Gaussian, Inc., Wallingford CT, **2010**.

<sup>6</sup> Hariharan, P. C.; Pople, J. A. *Mol. Phys.* **1974**, *27*, 209-214.

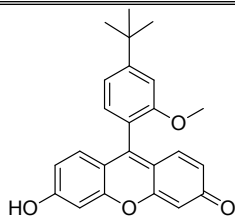

Compound 1

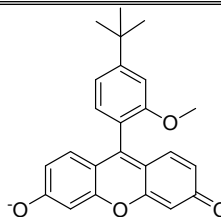

Compound 1\_anion

GEOMETRY for C<sub>24</sub>H<sub>22</sub>O<sub>4</sub>

|   |              |              |              |
|---|--------------|--------------|--------------|
| C | 10.865697000 | 2.494815000  | 0.923443000  |
| C | 11.412123000 | 3.590664000  | 0.098025000  |
| C | 8.944510000  | 3.846021000  | 1.617399000  |
| C | 10.619833000 | 4.815857000  | 0.075746000  |
| C | 9.467834000  | 4.918778000  | 0.786577000  |
| C | 7.769589000  | 4.025823000  | 2.319045000  |
| C | 7.074871000  | 5.291371000  | 2.213861000  |
| C | 7.619207000  | 6.295662000  | 1.386667000  |
| O | 8.775053000  | 6.104949000  | 0.699637000  |
| C | 5.882339000  | 5.605086000  | 2.902646000  |
| C | 5.263315000  | 6.833103000  | 2.766092000  |
| C | 5.829412000  | 7.806587000  | 1.922433000  |
| C | 7.011354000  | 7.540840000  | 1.233094000  |
| O | 5.176842000  | 8.996176000  | 1.824309000  |
| C | 7.225431000  | 2.959368000  | 3.207790000  |
| C | 7.853724000  | 2.636234000  | 4.410657000  |
| C | 7.353459000  | 1.645675000  | 5.259950000  |
| C | 6.196062000  | 0.936364000  | 4.926477000  |
| C | 5.559230000  | 1.254866000  | 3.712734000  |
| C | 6.056928000  | 2.243894000  | 2.862867000  |
| O | 5.489803000  | 2.585057000  | 1.669676000  |
| C | 4.324900000  | 1.896045000  | 1.241788000  |
| H | 10.971978000 | 5.644614000  | -0.528520000 |
| H | 4.348126000  | 7.069199000  | 3.298071000  |
| H | 7.475343000  | 8.276964000  | 0.582626000  |
| H | 8.753288000  | 3.177600000  | 4.690668000  |
| H | 4.664331000  | 0.715422000  | 3.426906000  |
| H | 3.490431000  | 2.039077000  | 1.940803000  |
| H | 4.515405000  | 0.822014000  | 1.119712000  |
| H | 4.063632000  | 2.328950000  | 0.274822000  |
| H | 11.437815000 | 1.571591000  | 0.932074000  |
| H | 5.449896000  | 4.858551000  | 3.559511000  |
| H | 5.662465000  | 9.581458000  | 1.221636000  |
| O | 12.467341000 | 3.462674000  | -0.532980000 |
| C | 9.716494000  | 2.619584000  | 1.625933000  |
| H | 9.338546000  | 1.792522000  | 2.217558000  |
| C | 5.601983000  | -0.164402000 | 5.825040000  |
| H | 7.882548000  | 1.440457000  | 6.182635000  |
| C | 4.168690000  | 0.235628000  | 6.249238000  |
| H | 3.508604000  | 0.367623000  | 5.385571000  |
| H | 4.175113000  | 1.175599000  | 6.812691000  |
| H | 3.729753000  | -0.540424000 | 6.887907000  |
| C | 5.552888000  | -1.499658000 | 5.044701000  |
| H | 6.556553000  | -1.807760000 | 4.730815000  |
| H | 4.929351000  | -1.428035000 | 4.147313000  |
| H | 5.135672000  | -2.293292000 | 5.676155000  |
| C | 6.434810000  | -0.387167000 | 7.101775000  |
| H | 6.482595000  | 0.515517000  | 7.721216000  |
| H | 7.459425000  | -0.699745000 | 6.871207000  |
| H | 5.976406000  | -1.177795000 | 7.706003000  |

THERMAL INFORMATION

Sum of electronic and thermal Energies = -1228.251238  
 Sum of electronic and thermal Enthalpies = -1228.250294  
 Sum of electronic and thermal Free Energies = -1228.330677

GEOMETRY for C<sub>24</sub>H<sub>21</sub>O<sub>4</sub>

|   |              |              |              |
|---|--------------|--------------|--------------|
| C | 10.758034000 | 2.430673000  | 0.811878000  |
| C | 11.307277000 | 3.495707000  | -0.034083000 |
| C | 8.903333000  | 3.832505000  | 1.579287000  |
| C | 10.554589000 | 4.737253000  | -0.013644000 |
| C | 9.424366000  | 4.882199000  | 0.746752000  |
| C | 7.735120000  | 4.070124000  | 2.325952000  |
| C | 7.091514000  | 5.318452000  | 2.260801000  |
| C | 7.638260000  | 6.343034000  | 1.414965000  |
| O | 8.780267000  | 6.095036000  | 0.691083000  |
| C | 5.907615000  | 5.669022000  | 2.987829000  |
| C | 5.327587000  | 6.898259000  | 2.879267000  |
| C | 5.869590000  | 7.951815000  | 2.014098000  |
| C | 7.073323000  | 7.584828000  | 1.289863000  |
| O | 5.328533000  | 9.074373000  | 1.919709000  |
| C | 7.192144000  | 2.996447000  | 3.215657000  |
| C | 7.755888000  | 2.746231000  | 4.464521000  |
| C | 7.265978000  | 1.750144000  | 5.317053000  |
| C | 6.179397000  | 0.959935000  | 4.936908000  |
| C | 5.603923000  | 1.202065000  | 3.675773000  |
| C | 6.095325000  | 2.196438000  | 2.826652000  |
| O | 5.577895000  | 2.463258000  | 1.591828000  |
| C | 4.458756000  | 1.725100000  | 1.146122000  |
| H | 10.905375000 | 5.563779000  | -0.623601000 |
| H | 4.429582000  | 7.147968000  | 3.439701000  |
| H | 7.528025000  | 8.322772000  | 0.636500000  |
| H | 8.602425000  | 3.351356000  | 4.777188000  |
| H | 4.761843000  | 0.600505000  | 3.353890000  |
| H | 3.592098000  | 1.858262000  | 1.808998000  |
| H | 4.683595000  | 0.652122000  | 1.062574000  |
| H | 4.217607000  | 2.119539000  | 0.157063000  |
| H | 11.297709000 | 1.486439000  | 0.811025000  |
| H | 5.475033000  | 4.919069000  | 3.645782000  |
| O | 12.341525000 | 3.332827000  | -0.716237000 |
| C | 9.631734000  | 2.597759000  | 1.562338000  |
| H | 9.258890000  | 1.779436000  | 2.173208000  |
| C | 5.596400000  | -0.151151000 | 5.830473000  |
| H | 7.747921000  | 1.606876000  | 6.277507000  |
| C | 4.116027000  | 0.162934000  | 6.151859000  |
| H | 3.508657000  | 0.234513000  | 5.243432000  |
| H | 4.026906000  | 1.115426000  | 6.686548000  |
| H | 3.684000000  | -0.624954000 | 6.782537000  |
| C | 5.681745000  | -1.509749000 | 5.095112000  |
| H | 6.722501000  | -1.762471000 | 4.862595000  |
| H | 5.124738000  | -1.498504000 | 4.152386000  |
| H | 5.266246000  | -2.311354000 | 5.719602000  |
| C | 6.354593000  | -0.285026000 | 7.164977000  |
| H | 6.306542000  | 0.638031000  | 7.753465000  |
| H | 7.410101000  | -0.535097000 | 7.009404000  |
| H | 5.908465000  | -1.086206000 | 7.766403000  |

THERMAL INFORMATION

Sum of electronic and thermal Energies = -1227.731698  
 Sum of electronic and thermal Enthalpies = -1227.730754  
 Sum of electronic and thermal Free Energies = -1227.810439

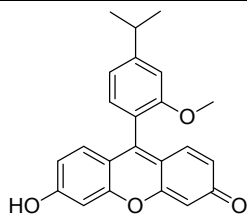

Compound 2

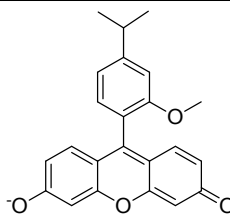

Compound 2\_anion

**GEOMETRY for C<sub>23</sub>H<sub>20</sub>O<sub>4</sub>**

|   |              |              |              |
|---|--------------|--------------|--------------|
| C | 10.850376000 | 2.447189000  | 1.063225000  |
| C | 11.423261000 | 3.528492000  | 0.236492000  |
| C | 8.927936000  | 3.823381000  | 1.701984000  |
| C | 10.643849000 | 4.761172000  | 0.185549000  |
| C | 9.478889000  | 4.882666000  | 0.871850000  |
| C | 7.739406000  | 4.020412000  | 2.375094000  |
| C | 7.058849000  | 5.290899000  | 2.242924000  |
| C | 7.631613000  | 6.283004000  | 1.420090000  |
| O | 8.800241000  | 6.075014000  | 0.760154000  |
| C | 5.853521000  | 5.620899000  | 2.901065000  |
| C | 5.249775000  | 6.853685000  | 2.740887000  |
| C | 5.845070000  | 7.815261000  | 1.903629000  |
| C | 7.039800000  | 7.532814000  | 1.243474000  |
| O | 5.207004000  | 9.010542000  | 1.782128000  |
| C | 7.165274000  | 2.966640000  | 3.260891000  |
| C | 7.755784000  | 2.663599000  | 4.489674000  |
| C | 7.224798000  | 1.684309000  | 5.331482000  |
| C | 6.081342000  | 0.973535000  | 4.960578000  |
| C | 5.480653000  | 1.266762000  | 3.725811000  |
| C | 6.008958000  | 2.247343000  | 2.882519000  |
| O | 5.484749000  | 2.575896000  | 1.666883000  |
| C | 4.332006000  | 1.885106000  | 1.209215000  |
| H | 11.016639000 | 5.580211000  | -0.419606000 |
| H | 4.324778000  | 7.102673000  | 3.249514000  |
| H | 7.525596000  | 8.259426000  | 0.598242000  |
| H | 8.645059000  | 3.210873000  | 4.790145000  |
| H | 4.596813000  | 0.716843000  | 3.423356000  |
| H | 3.477003000  | 2.036213000  | 1.881076000  |
| H | 4.523927000  | 0.809654000  | 1.103091000  |
| H | 4.101813000  | 2.309555000  | 0.230708000  |
| H | 11.413985000 | 1.519223000  | 1.094126000  |
| H | 5.398956000  | 4.883321000  | 3.553165000  |
| H | 5.712825000  | 9.587026000  | 1.187640000  |
| O | 12.489246000 | 3.383361000  | -0.372269000 |
| C | 9.688323000  | 2.590282000  | 1.740580000  |
| H | 9.290823000  | 1.773657000  | 2.333998000  |
| C | 5.502532000  | -0.099561000 | 5.873687000  |
| H | 7.707047000  | 1.474719000  | 6.282564000  |
| C | 4.074047000  | 0.245510000  | 6.335889000  |
| H | 6.137815000  | -0.132030000 | 6.768815000  |
| H | 3.375610000  | 0.274330000  | 5.490855000  |
| H | 4.041682000  | 1.222504000  | 6.830130000  |
| H | 3.707091000  | -0.507508000 | 7.043088000  |
| C | 5.552043000  | -1.495145000 | 5.223075000  |
| H | 6.572218000  | -1.757299000 | 4.922864000  |
| H | 4.917831000  | -1.542607000 | 4.329708000  |
| H | 5.195145000  | -2.258852000 | 5.923965000  |

**THERMAL INFORMATION**

Sum of electronic and thermal Energies = -1188.970368  
 Sum of electronic and thermal Enthalpies = -1188.969424  
 Sum of electronic and thermal Free Energies = -1189.048941

**GEOMETRY for C<sub>23</sub>H<sub>19</sub>O<sub>4</sub>**

|   |              |              |              |
|---|--------------|--------------|--------------|
| C | 10.753811000 | 2.390161000  | 0.972715000  |
| C | 11.333784000 | 3.441239000  | 0.129779000  |
| C | 8.888507000  | 3.813552000  | 1.671457000  |
| C | 10.590019000 | 4.688251000  | 0.115117000  |
| C | 9.440279000  | 4.849919000  | 0.842154000  |
| C | 7.701429000  | 4.067569000  | 2.381999000  |
| C | 7.069154000  | 5.319561000  | 2.285266000  |
| C | 7.647473000  | 6.331082000  | 1.444593000  |
| O | 8.807330000  | 6.066856000  | 0.755631000  |
| C | 5.867333000  | 5.686139000  | 2.974098000  |
| C | 5.300180000  | 6.918494000  | 2.836602000  |
| C | 5.874929000  | 7.959034000  | 1.976702000  |
| C | 7.095993000  | 7.575679000  | 1.291018000  |
| O | 5.345822000  | 9.084753000  | 1.855959000  |
| C | 7.126453000  | 3.007852000  | 3.268770000  |
| C | 7.649380000  | 2.780235000  | 4.541316000  |
| C | 7.126789000  | 1.797498000  | 5.387729000  |
| C | 6.054390000  | 1.006484000  | 4.975387000  |
| C | 5.517999000  | 1.220658000  | 3.695293000  |
| C | 6.043107000  | 2.203320000  | 2.850511000  |
| O | 5.572374000  | 2.453747000  | 1.594002000  |
| C | 4.472032000  | 1.706484000  | 1.117243000  |
| H | 10.963897000 | 5.505338000  | -0.493841000 |
| H | 4.388331000  | 7.180448000  | 3.368331000  |
| H | 7.574700000  | 8.303469000  | 0.643451000  |
| H | 8.484813000  | 3.391442000  | 4.871265000  |
| H | 4.685932000  | 0.610601000  | 3.360269000  |
| H | 3.580820000  | 1.847889000  | 1.744793000  |
| H | 4.701770000  | 0.632972000  | 1.058758000  |
| H | 4.268029000  | 2.085381000  | 0.113856000  |
| H | 11.286710000 | 1.442437000  | 0.998061000  |
| H | 5.410113000  | 4.945860000  | 3.626301000  |
| O | 12.385359000 | 3.263171000  | -0.521391000 |
| C | 9.608243000  | 2.573750000  | 1.689396000  |
| H | 9.212735000  | 1.765234000  | 2.299146000  |
| C | 5.481068000  | -0.066683000 | 5.892579000  |
| H | 7.559592000  | 1.650035000  | 6.374667000  |
| C | 4.012282000  | 0.212935000  | 6.262884000  |
| H | 6.064731000  | -0.035377000 | 6.823014000  |
| H | 3.366829000  | 0.187824000  | 5.376665000  |
| H | 3.903471000  | 1.200558000  | 6.723979000  |
| H | 3.638228000  | -0.539339000 | 6.968965000  |
| C | 5.640728000  | -1.479415000 | 5.299510000  |
| H | 6.690231000  | -1.694035000 | 5.070779000  |
| H | 5.069617000  | -1.587482000 | 4.369591000  |
| H | 5.279206000  | -2.240583000 | 6.002633000  |

**THERMAL INFORMATION**

Sum of electronic and thermal Energies = -1188.450876  
 Sum of electronic and thermal Enthalpies = -1188.449931  
 Sum of electronic and thermal Free Energies = -1188.528032

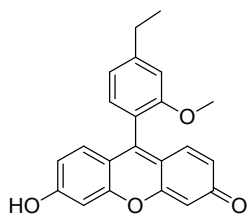

Compound 3

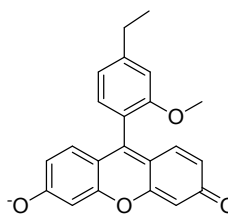

Compound 3\_anion

**GEOMETRY for C<sub>22</sub>H<sub>18</sub>O<sub>4</sub>**

|   |              |              |              |
|---|--------------|--------------|--------------|
| C | 10.885960000 | 2.474650000  | 1.088194000  |
| C | 11.463971000 | 3.578772000  | 0.295617000  |
| C | 8.932966000  | 3.815186000  | 1.709253000  |
| C | 10.670520000 | 4.802536000  | 0.249953000  |
| C | 9.489059000  | 4.896948000  | 0.911794000  |
| C | 7.727889000  | 3.985702000  | 2.359592000  |
| C | 7.035278000  | 5.250721000  | 2.236879000  |
| C | 7.613494000  | 6.264673000  | 1.445220000  |
| O | 8.798170000  | 6.082614000  | 0.806745000  |
| C | 5.812664000  | 5.555007000  | 2.875487000  |
| C | 5.197965000  | 6.783708000  | 2.725135000  |
| C | 5.799222000  | 7.767308000  | 1.918364000  |
| C | 7.010822000  | 7.510649000  | 1.278762000  |
| O | 5.150030000  | 8.957369000  | 1.804637000  |
| C | 7.144456000  | 2.908307000  | 3.210558000  |
| C | 7.703094000  | 2.593413000  | 4.452209000  |
| C | 7.163031000  | 1.592785000  | 5.261524000  |
| C | 6.041216000  | 0.873944000  | 4.841371000  |
| C | 5.474459000  | 1.175641000  | 3.594044000  |
| C | 6.012239000  | 2.179199000  | 2.783172000  |
| O | 5.522602000  | 2.518119000  | 1.556365000  |
| C | 4.387567000  | 1.825225000  | 1.058881000  |
| H | 11.046541000 | 5.637245000  | -0.331289000 |
| H | 4.259569000  | 7.012607000  | 3.218425000  |
| H | 7.501410000  | 8.254480000  | 0.657178000  |
| H | 8.576395000  | 3.147098000  | 4.785990000  |
| H | 4.611877000  | 0.608786000  | 3.259619000  |
| H | 3.516346000  | 1.956459000  | 1.713763000  |
| H | 4.592053000  | 0.753717000  | 0.937971000  |
| H | 4.176372000  | 2.265217000  | 0.082982000  |
| H | 11.460198000 | 1.553094000  | 1.114375000  |
| H | 5.352981000  | 4.800584000  | 3.504463000  |
| H | 5.661592000  | 9.549710000  | 1.231024000  |
| O | 12.545371000 | 3.458293000  | -0.290914000 |
| C | 9.707181000  | 2.590649000  | 1.741413000  |
| H | 9.305815000  | 1.758173000  | 2.309577000  |
| C | 5.417340000  | -0.188189000 | 5.722407000  |
| H | 7.620554000  | 1.370889000  | 6.222068000  |
| C | 4.257462000  | 0.351216000  | 6.579137000  |
| H | 6.185630000  | -0.611453000 | 6.380726000  |
| H | 5.050984000  | -1.014108000 | 5.099283000  |
| H | 3.456821000  | 0.755274000  | 5.949276000  |
| H | 4.598706000  | 1.155987000  | 7.239694000  |
| H | 3.831126000  | -0.443200000 | 7.202077000  |

**THERMAL INFORMATION**

Sum of electronic and thermal Energies = -1149.686813  
 Sum of electronic and thermal Enthalpies = -1149.685869  
 Sum of electronic and thermal Free Energies = -1149.761610

**GEOMETRY for C<sub>22</sub>H<sub>17</sub>O<sub>4</sub>**

|   |              |              |              |
|---|--------------|--------------|--------------|
| C | 10.717948000 | 2.399213000  | 0.913088000  |
| C | 11.292319000 | 3.465996000  | 0.085742000  |
| C | 8.862915000  | 3.812388000  | 1.656210000  |
| C | 10.553489000 | 4.715856000  | 0.105269000  |
| C | 9.411309000  | 4.865728000  | 0.846571000  |
| C | 7.684712000  | 4.054269000  | 2.384159000  |
| C | 7.057251000  | 5.310854000  | 2.324831000  |
| C | 7.632013000  | 6.340134000  | 1.503203000  |
| O | 8.782932000  | 6.087043000  | 0.795306000  |
| C | 5.860723000  | 5.663805000  | 3.030060000  |
| C | 5.297539000  | 6.901451000  | 2.927389000  |
| C | 5.870824000  | 7.961496000  | 2.090705000  |
| C | 7.084300000  | 7.590223000  | 1.384939000  |
| O | 5.346028000  | 9.092261000  | 2.002950000  |
| C | 7.108030000  | 2.974619000  | 3.246507000  |
| C | 7.546134000  | 2.796432000  | 4.559068000  |
| C | 7.022158000  | 1.794245000  | 5.380728000  |
| C | 6.032564000  | 0.936105000  | 4.899571000  |
| C | 5.583795000  | 1.098354000  | 3.580288000  |
| C | 6.109900000  | 2.102264000  | 2.760408000  |
| O | 5.721401000  | 2.309256000  | 1.468534000  |
| C | 4.720156000  | 1.477566000  | 0.918478000  |
| H | 10.925536000 | 5.544703000  | -0.488706000 |
| H | 4.389509000  | 7.152965000  | 3.470544000  |
| H | 7.559897000  | 8.331445000  | 0.750414000  |
| H | 8.318696000  | 3.459899000  | 4.937854000  |
| H | 4.820479000  | 0.426752000  | 3.200114000  |
| H | 3.772839000  | 1.560613000  | 1.469790000  |
| H | 5.031100000  | 0.423395000  | 0.898518000  |
| H | 4.571940000  | 1.827793000  | -0.104932000 |
| H | 11.249911000 | 1.450633000  | 0.915686000  |
| H | 5.403997000  | 4.908191000  | 3.664853000  |
| O | 12.336721000 | 3.298104000  | -0.579602000 |
| C | 9.579776000  | 2.571323000  | 1.644161000  |
| H | 9.188188000  | 1.753795000  | 2.244557000  |
| C | 5.417731000  | -0.127390000 | 5.786421000  |
| H | 7.389449000  | 1.682002000  | 6.398492000  |
| C | 4.132251000  | 0.345836000  | 6.488613000  |
| H | 6.148122000  | -0.436770000 | 6.545024000  |
| H | 5.191740000  | -1.021465000 | 5.189861000  |
| H | 3.370604000  | 0.637510000  | 5.756516000  |
| H | 4.332093000  | 1.218230000  | 7.120844000  |
| H | 3.711889000  | -0.446122000 | 7.120976000  |

**THERMAL INFORMATION**

Sum of electronic and thermal Energies = -1149.167299  
 Sum of electronic and thermal Enthalpies = -1149.166355  
 Sum of electronic and thermal Free Energies = -1149.242468



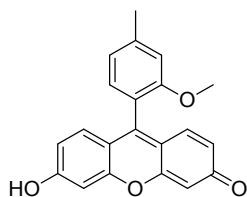

Compound 4

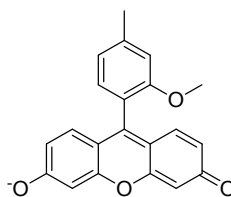

Compound 4\_anion

**GEOMETRY for C<sub>21</sub>H<sub>16</sub>O<sub>4</sub>**

|   |              |              |              |
|---|--------------|--------------|--------------|
| C | 10.862218000 | 2.443174000  | 1.163471000  |
| C | 11.465437000 | 3.530306000  | 0.366458000  |
| C | 8.915707000  | 3.814139000  | 1.737284000  |
| C | 10.687658000 | 4.762944000  | 0.293955000  |
| C | 9.497281000  | 4.879344000  | 0.936085000  |
| C | 7.701991000  | 4.006078000  | 2.365394000  |
| C | 7.026333000  | 5.277315000  | 2.216288000  |
| C | 7.629534000  | 6.275258000  | 1.422851000  |
| O | 8.822553000  | 6.072124000  | 0.806485000  |
| C | 5.796786000  | 5.602437000  | 2.830652000  |
| C | 5.198904000  | 6.836172000  | 2.656289000  |
| C | 5.825128000  | 7.803640000  | 1.848913000  |
| C | 7.044195000  | 7.526106000  | 1.232601000  |
| O | 5.191602000  | 8.999615000  | 1.711490000  |
| C | 7.093701000  | 2.945528000  | 3.219760000  |
| C | 7.634494000  | 2.633928000  | 4.468971000  |
| C | 7.072726000  | 1.647003000  | 5.281925000  |
| C | 5.946849000  | 0.939850000  | 4.856997000  |
| C | 5.396118000  | 1.238705000  | 3.600967000  |
| C | 5.955186000  | 2.227284000  | 2.787745000  |
| O | 5.480842000  | 2.563782000  | 1.554354000  |
| C | 4.346962000  | 1.875914000  | 1.047243000  |
| H | 11.082751000 | 5.586155000  | -0.291053000 |
| H | 4.255203000  | 7.081482000  | 3.131203000  |
| H | 7.553729000  | 8.257380000  | 0.611391000  |
| H | 8.510564000  | 3.179528000  | 4.808541000  |
| H | 4.527523000  | 0.683121000  | 3.263691000  |
| H | 3.467751000  | 2.019504000  | 1.688736000  |
| H | 4.544546000  | 0.801804000  | 0.938335000  |
| H | 4.152694000  | 2.309390000  | 0.064942000  |
| H | 11.425013000 | 1.515365000  | 1.209803000  |
| H | 5.318460000  | 4.860290000  | 3.460196000  |
| H | 5.719634000  | 9.580377000  | 1.140970000  |
| O | 12.554008000 | 3.389761000  | -0.202065000 |
| C | 9.674972000  | 2.581129000  | 1.796774000  |
| H | 9.255720000  | 1.760344000  | 2.369092000  |
| C | 5.315327000  | -0.124913000 | 5.723239000  |
| H | 7.516269000  | 1.429632000  | 6.249634000  |
| H | 4.324546000  | 0.186552000  | 6.078314000  |
| H | 5.930083000  | -0.339461000 | 6.602499000  |
| H | 5.179001000  | -1.062088000 | 5.170579000  |

**GEOMETRY for C<sub>21</sub>H<sub>16</sub>O<sub>4</sub>**

|   |              |              |              |
|---|--------------|--------------|--------------|
| C | 10.788179000 | 2.399349000  | 1.088098000  |
| C | 11.397453000 | 3.457788000  | 0.275650000  |
| C | 8.885727000  | 3.808334000  | 1.712220000  |
| C | 10.647077000 | 4.700172000  | 0.234069000  |
| C | 9.466165000  | 4.851647000  | 0.911728000  |
| C | 7.667743000  | 4.052153000  | 2.372425000  |
| C | 7.033221000  | 5.301331000  | 2.254467000  |
| C | 7.640424000  | 6.319629000  | 1.443067000  |
| O | 8.829804000  | 6.064968000  | 0.802543000  |
| C | 5.801649000  | 5.658343000  | 2.894014000  |
| C | 5.233443000  | 6.887979000  | 2.737525000  |
| C | 5.837310000  | 7.935139000  | 1.906171000  |
| C | 7.088400000  | 7.561671000  | 1.271083000  |
| O | 5.306809000  | 9.058195000  | 1.767350000  |
| C | 7.060124000  | 2.984254000  | 3.226989000  |
| C | 7.533954000  | 2.744982000  | 4.516273000  |
| C | 6.981283000  | 1.753317000  | 5.333533000  |
| C | 5.926969000  | 0.967666000  | 4.870568000  |
| C | 5.438596000  | 1.192449000  | 3.573825000  |
| C | 5.994172000  | 2.182870000  | 2.758931000  |
| O | 5.572555000  | 2.444032000  | 1.487446000  |
| C | 4.492355000  | 1.699424000  | 0.962732000  |
| H | 11.041574000 | 5.522175000  | -0.354948000 |
| H | 4.298795000  | 7.142750000  | 3.231822000  |
| H | 7.589606000  | 8.294809000  | 0.647010000  |
| H | 8.355398000  | 3.353726000  | 4.883711000  |
| H | 4.620046000  | 0.580473000  | 3.208182000  |
| H | 3.577961000  | 1.833991000  | 1.557521000  |
| H | 4.726053000  | 0.626771000  | 0.904065000  |
| H | 4.325851000  | 2.086751000  | -0.044358000 |
| H | 11.325354000 | 1.454727000  | 1.132172000  |
| H | 5.322377000  | 4.913037000  | 3.524275000  |
| O | 12.477300000 | 3.289098000  | -0.330273000 |
| C | 9.611622000  | 2.572679000  | 1.755482000  |
| H | 9.195079000  | 1.758949000  | 2.343821000  |
| C | 5.309555000  | -0.109406000 | 5.733835000  |
| H | 7.376064000  | 1.595895000  | 6.334478000  |
| H | 4.248739000  | 0.091726000  | 5.933698000  |
| H | 5.820333000  | -0.185196000 | 6.699345000  |
| H | 5.362881000  | -1.093648000 | 5.250452000  |

**THERMAL INFORMATION:**

Sum of electronic and thermal Energies = -1110.403499  
 Sum of electronic and thermal Enthalpies = -1110.402554  
 Sum of electronic and thermal Free Energies = -1110.475838

**THERMAL INFORMATION:**

Sum of electronic and thermal Energies = -1109.883882  
 Sum of electronic and thermal Enthalpies = -1109.882938  
 Sum of electronic and thermal Free Energies = -1109.956538

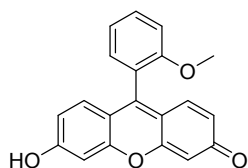

Compound 5

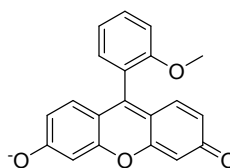

Compound 5\_anion

**GEOMETRY for C<sub>20</sub>H<sub>14</sub>O<sub>4</sub>**

|   |              |             |              |
|---|--------------|-------------|--------------|
| C | 10.499829000 | 2.515629000 | 0.626124000  |
| C | 10.911900000 | 3.606967000 | -0.160806000 |
| C | 9.472903000  | 2.679822000 | 1.536244000  |
| C | 8.815162000  | 3.918900000 | 1.701448000  |
| C | 10.294739000 | 4.849118000 | -0.022176000 |
| C | 9.261503000  | 4.992215000 | 0.902574000  |
| O | 11.926377000 | 3.388374000 | -1.040074000 |
| C | 7.739345000  | 4.153601000 | 2.640456000  |
| C | 7.190814000  | 5.416411000 | 2.731106000  |
| C | 7.693449000  | 6.490018000 | 1.888415000  |
| O | 8.711296000  | 6.230113000 | 0.999091000  |
| C | 6.099164000  | 5.766584000 | 3.617679000  |
| C | 5.597702000  | 7.021694000 | 3.670466000  |
| C | 6.119890000  | 8.118947000 | 2.830973000  |
| C | 7.206658000  | 7.756589000 | 1.926973000  |
| O | 5.653750000  | 9.261864000 | 2.895063000  |
| C | 7.271761000  | 3.039533000 | 3.516561000  |
| C | 7.587876000  | 3.026751000 | 4.878730000  |
| C | 7.167993000  | 1.988246000 | 5.712951000  |
| C | 6.416605000  | 0.946123000 | 5.176582000  |
| C | 6.082116000  | 0.934373000 | 3.820071000  |
| C | 6.505957000  | 1.976168000 | 2.987394000  |
| H | 11.002278000 | 1.562279000 | 0.503836000  |
| H | 9.161923000  | 1.840189000 | 2.148037000  |
| H | 10.597962000 | 5.710423000 | -0.610818000 |
| H | 12.122188000 | 4.210310000 | -1.517246000 |
| H | 5.688444000  | 4.981421000 | 4.243682000  |
| H | 4.777711000  | 7.276886000 | 4.335410000  |
| H | 7.615278000  | 8.525427000 | 1.280519000  |
| H | 8.176989000  | 3.845457000 | 5.282504000  |
| H | 5.490315000  | 0.117861000 | 3.422709000  |
| O | 6.223634000  | 2.058017000 | 1.656480000  |
| C | 5.447195000  | 1.029291000 | 1.059644000  |
| H | 6.080186000  | 0.130779000 | 5.811266000  |
| H | 4.449160000  | 0.966204000 | 1.511758000  |
| H | 5.943339000  | 0.053165000 | 1.137265000  |
| H | 5.351218000  | 1.303515000 | 0.007988000  |
| H | 7.427392000  | 1.997738000 | 6.767118000  |

**GEOMETRY for C<sub>20</sub>H<sub>13</sub>O<sub>4</sub>**

|   |              |             |              |
|---|--------------|-------------|--------------|
| C | 10.775302000 | 2.613941000 | 0.795929000  |
| C | 11.228393000 | 3.727712000 | -0.044657000 |
| C | 9.706214000  | 2.717623000 | 1.636015000  |
| C | 8.947907000  | 3.927792000 | 1.757315000  |
| C | 10.449561000 | 4.946138000 | 0.087706000  |
| C | 9.378245000  | 5.027042000 | 0.937535000  |
| O | 12.209995000 | 3.622245000 | -0.810744000 |
| C | 7.835831000  | 4.099578000 | 2.599837000  |
| C | 7.159694000  | 5.331079000 | 2.644088000  |
| C | 7.616421000  | 6.408106000 | 1.809451000  |
| O | 8.703582000  | 6.223594000 | 0.988678000  |
| C | 6.021515000  | 5.612503000 | 3.468227000  |
| C | 5.405854000  | 6.829207000 | 3.462166000  |
| C | 5.859274000  | 7.937758000 | 2.614874000  |
| C | 7.014096000  | 7.638239000 | 1.787042000  |
| O | 5.287334000  | 9.048832000 | 2.616302000  |
| C | 7.382842000  | 2.969465000 | 3.471889000  |
| C | 7.928473000  | 2.788535000 | 4.744226000  |
| C | 7.521839000  | 1.740049000 | 5.575838000  |
| C | 6.549001000  | 0.852958000 | 5.125993000  |
| C | 5.983659000  | 1.006884000 | 3.856663000  |
| C | 6.396949000  | 2.059362000 | 3.031055000  |
| H | 11.340272000 | 1.688063000 | 0.716452000  |
| H | 9.405162000  | 1.867003000 | 2.242697000  |
| H | 10.732800000 | 5.807311000 | -0.509246000 |
| H | 5.653630000  | 4.818735000 | 4.114063000  |
| H | 4.543436000  | 7.026269000 | 4.094752000  |
| H | 7.399843000  | 8.417802000 | 1.137653000  |
| H | 8.687244000  | 3.489387000 | 5.081226000  |
| H | 5.226977000  | 0.306697000 | 3.520377000  |
| O | 5.901875000  | 2.284538000 | 1.779400000  |
| C | 4.906537000  | 1.415980000 | 1.277642000  |
| H | 6.219380000  | 0.031282000 | 5.757680000  |
| H | 4.000586000  | 1.431726000 | 1.899913000  |
| H | 5.269451000  | 0.381254000 | 1.200081000  |
| H | 4.663461000  | 1.787008000 | 0.280061000  |
| H | 7.963365000  | 1.623303000 | 6.561822000  |

**THERMAL INFORMATION:**

Sum of electronic and thermal Energies = -1071.114512  
 Sum of electronic and thermal Enthalpies = -1071.113568  
 Sum of electronic and thermal Free Energies = -1071.181450

**THERMAL INFORMATION:**

Sum of electronic and thermal Energies = -1070.595598  
 Sum of electronic and thermal Enthalpies = -1070.594653  
 Sum of electronic and thermal Free Energies = -1070.663920

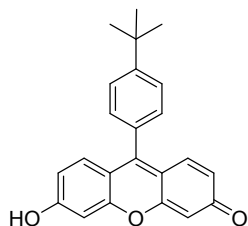

Compound 6

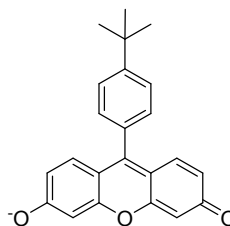

Compound 6\_anion

GEOMETRY for C<sub>23</sub>H<sub>20</sub>O<sub>3</sub>

|   |              |              |              |
|---|--------------|--------------|--------------|
| C | 11.157590000 | 2.899979000  | 1.134672000  |
| C | 11.524697000 | 3.988588000  | 0.322747000  |
| C | 9.971946000  | 2.945285000  | 1.843793000  |
| C | 9.110052000  | 4.064736000  | 1.786156000  |
| C | 10.695012000 | 5.104659000  | 0.224203000  |
| C | 9.503470000  | 5.129523000  | 0.946620000  |
| O | 12.701792000 | 3.890310000  | -0.349945000 |
| C | 7.853593000  | 4.172047000  | 2.500592000  |
| C | 7.080807000  | 5.304797000  | 2.331339000  |
| C | 7.528003000  | 6.365359000  | 1.442485000  |
| O | 8.733411000  | 6.236251000  | 0.789838000  |
| C | 5.825469000  | 5.543537000  | 3.015755000  |
| C | 5.101696000  | 6.667436000  | 2.808419000  |
| C | 5.537520000  | 7.730381000  | 1.880711000  |
| C | 6.817053000  | 7.499533000  | 1.217864000  |
| O | 4.860340000  | 8.747429000  | 1.695651000  |
| C | 7.423056000  | 3.059704000  | 3.393514000  |
| C | 8.141268000  | 2.749842000  | 4.559815000  |
| C | 7.733896000  | 1.711568000  | 5.391557000  |
| C | 6.603659000  | 0.927406000  | 5.099345000  |
| C | 5.898106000  | 1.241094000  | 3.930167000  |
| C | 6.295183000  | 2.286530000  | 3.093976000  |
| H | 11.814033000 | 2.038100000  | 1.184059000  |
| H | 9.688939000  | 2.099988000  | 2.460760000  |
| H | 10.946797000 | 5.954147000  | -0.404430000 |
| H | 12.842691000 | 4.694043000  | -0.875188000 |
| H | 5.479859000  | 4.787670000  | 3.712746000  |
| H | 4.163654000  | 6.840644000  | 3.327760000  |
| H | 7.191291000  | 8.261567000  | 0.543194000  |
| H | 9.016676000  | 3.337690000  | 4.822706000  |
| H | 5.020140000  | 0.669105000  | 3.651777000  |
| C | 6.192956000  | -0.214939000 | 6.045441000  |
| H | 8.311593000  | 1.513749000  | 6.290169000  |
| C | 5.902147000  | 0.362247000  | 7.451450000  |
| C | 4.931921000  | -0.953301000 | 5.558751000  |
| C | 7.346849000  | -1.241492000 | 6.140489000  |
| H | 5.725632000  | 2.498645000  | 2.193331000  |
| H | 5.083810000  | 1.090254000  | 7.415419000  |
| H | 6.777513000  | 0.864053000  | 7.876847000  |
| H | 5.612106000  | -0.441077000 | 8.139316000  |
| H | 5.082221000  | -1.415276000 | 4.576320000  |
| H | 4.065792000  | -0.284875000 | 5.495011000  |
| H | 4.679121000  | -1.753180000 | 6.263395000  |
| H | 8.266741000  | -0.787393000 | 6.523246000  |
| H | 7.569607000  | -1.673278000 | 5.158067000  |
| H | 7.073293000  | -2.060085000 | 6.817089000  |

GEOMETRY for C<sub>23</sub>H<sub>19</sub>O<sub>3</sub>

|   |              |              |              |
|---|--------------|--------------|--------------|
| C | 11.178817000 | 2.915287000  | 1.159679000  |
| C | 11.620773000 | 4.025120000  | 0.308947000  |
| C | 10.004021000 | 2.943650000  | 1.851476000  |
| C | 9.115056000  | 4.068778000  | 1.802458000  |
| C | 10.700316000 | 5.146438000  | 0.248448000  |
| C | 9.524383000  | 5.152461000  | 0.950635000  |
| O | 12.701913000 | 3.991702000  | -0.315999000 |
| C | 7.888849000  | 4.164150000  | 2.490033000  |
| C | 7.076673000  | 5.305449000  | 2.337099000  |
| C | 7.515465000  | 6.363393000  | 1.467713000  |
| O | 8.716948000  | 6.255441000  | 0.809730000  |
| C | 5.830685000  | 5.529256000  | 3.012471000  |
| C | 5.092076000  | 6.659042000  | 2.818747000  |
| C | 5.514863000  | 7.733029000  | 1.913970000  |
| C | 6.789166000  | 7.505260000  | 1.256457000  |
| O | 4.827777000  | 8.761492000  | 1.739080000  |
| C | 7.448967000  | 3.052297000  | 3.384830000  |
| C | 8.142030000  | 2.753733000  | 4.568152000  |
| C | 7.727295000  | 1.718942000  | 5.402221000  |
| C | 6.605715000  | 0.928294000  | 5.098399000  |
| C | 5.919812000  | 1.229720000  | 3.914487000  |
| C | 6.330243000  | 2.269361000  | 3.076810000  |
| H | 11.838209000 | 2.051919000  | 1.209383000  |
| H | 9.715779000  | 2.091337000  | 2.460806000  |
| H | 10.959156000 | 5.993990000  | -0.378267000 |
| H | 5.479098000  | 4.765970000  | 3.701280000  |
| H | 4.150502000  | 6.809999000  | 3.341552000  |
| H | 7.168958000  | 8.270317000  | 0.586708000  |
| H | 9.013208000  | 3.345960000  | 4.833703000  |
| H | 5.047781000  | 0.652899000  | 3.624658000  |
| C | 6.182716000  | -0.207295000 | 6.048381000  |
| H | 8.293689000  | 1.529201000  | 6.310902000  |
| C | 5.866728000  | 0.377868000  | 7.445376000  |
| C | 4.931345000  | -0.954444000 | 5.549920000  |
| C | 7.334730000  | -1.232344000 | 6.173714000  |
| H | 5.775265000  | 2.476146000  | 2.166043000  |
| H | 5.048018000  | 1.104246000  | 7.387977000  |
| H | 6.733866000  | 0.888498000  | 7.876904000  |
| H | 5.568220000  | -0.419441000 | 8.138483000  |
| H | 5.098760000  | -1.420838000 | 4.572423000  |
| H | 4.066006000  | -0.287300000 | 5.465482000  |
| H | 4.669020000  | -1.750613000 | 6.256851000  |
| H | 8.248429000  | -0.769433000 | 6.560363000  |
| H | 7.572266000  | -1.672841000 | 5.198617000  |
| H | 7.055406000  | -2.045100000 | 6.856899000  |

THERMAL INFORMATION:

Sum of electronic and thermal Energies = -1113.765131  
 Sum of electronic and thermal Enthalpies = -1113.764187  
 Sum of electronic and thermal Free Energies = -1113.838428

THERMAL INFORMATION:

Sum of electronic and thermal Energies = -1113.248877  
 Sum of electronic and thermal Enthalpies = -1113.247932  
 Sum of electronic and thermal Free Energies = -1113.321743

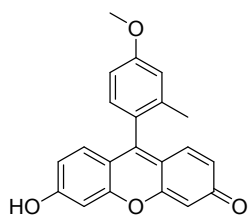

Compound 7

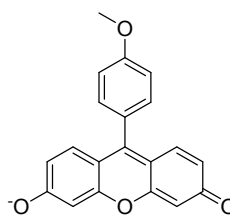

Compound 7\_anion

**GEOMETRY for C<sub>21</sub>H<sub>16</sub>O<sub>4</sub>**

|   |              |              |              |
|---|--------------|--------------|--------------|
| C | 10.748270000 | 2.547849000  | 0.795195000  |
| C | 11.127635000 | 3.637596000  | -0.010283000 |
| C | 9.673463000  | 2.676381000  | 1.655024000  |
| C | 8.933802000  | 3.876994000  | 1.747380000  |
| C | 10.428683000 | 4.842541000  | 0.056817000  |
| C | 9.347433000  | 4.950340000  | 0.929454000  |
| O | 12.191833000 | 3.454993000  | -0.836314000 |
| C | 7.801520000  | 4.068766000  | 2.628592000  |
| C | 7.172242000  | 5.296244000  | 2.649494000  |
| C | 7.639448000  | 6.371975000  | 1.789197000  |
| O | 8.711973000  | 6.150168000  | 0.954061000  |
| C | 6.029779000  | 5.603125000  | 3.486536000  |
| C | 5.442782000  | 6.821605000  | 3.471413000  |
| C | 5.919516000  | 7.918901000  | 2.604640000  |
| C | 7.066150000  | 7.601605000  | 1.758314000  |
| O | 5.372653000  | 9.026970000  | 2.603197000  |
| C | 7.355732000  | 2.944700000  | 3.507738000  |
| C | 7.774134000  | 2.913454000  | 4.848473000  |
| C | 7.398156000  | 1.885500000  | 5.701620000  |
| C | 6.580728000  | 0.854059000  | 5.221391000  |
| C | 6.151997000  | 0.875994000  | 3.889451000  |
| C | 6.530985000  | 1.910835000  | 3.022724000  |
| O | 6.258009000  | -0.116110000 | 6.122345000  |
| C | 5.427255000  | -1.186174000 | 5.697772000  |
| C | 6.034803000  | 1.906227000  | 1.594027000  |
| H | 11.313650000 | 1.624797000  | 0.727946000  |
| H | 9.384532000  | 1.840260000  | 2.283106000  |
| H | 10.704350000 | 5.700766000  | -0.549597000 |
| H | 12.359549000 | 4.271211000  | -1.333653000 |
| H | 5.657818000  | 4.815751000  | 4.134204000  |
| H | 4.586699000  | 7.046990000  | 4.100653000  |
| H | 7.448145000  | 8.374322000  | 1.100336000  |
| H | 8.406911000  | 3.713409000  | 5.223207000  |
| H | 7.721704000  | 1.861416000  | 6.737118000  |
| H | 5.510189000  | 0.090637000  | 3.505688000  |
| H | 5.890742000  | -1.758285000 | 4.883353000  |
| H | 4.441970000  | -0.827716000 | 5.372169000  |
| H | 5.305768000  | -1.832558000 | 6.568660000  |
| H | 5.363133000  | 1.061749000  | 1.413852000  |
| H | 6.863180000  | 1.834397000  | 0.879166000  |
| H | 5.489678000  | 2.827314000  | 1.357535000  |

**GEOMETRY for C<sub>21</sub>H<sub>15</sub>O<sub>4</sub>**

|   |              |              |              |
|---|--------------|--------------|--------------|
| C | 10.830775000 | 2.575389000  | 0.844838000  |
| C | 11.259871000 | 3.676894000  | -0.024359000 |
| C | 9.762782000  | 2.679582000  | 1.686339000  |
| C | 8.980260000  | 3.877684000  | 1.779461000  |
| C | 10.459592000 | 4.884289000  | 0.082501000  |
| C | 9.389683000  | 4.965613000  | 0.933456000  |
| O | 12.239028000 | 3.570802000  | -0.792749000 |
| C | 7.864330000  | 4.044450000  | 2.619807000  |
| C | 7.164191000  | 5.264665000  | 2.631908000  |
| C | 7.600739000  | 6.331895000  | 1.773140000  |
| O | 8.692911000  | 6.150520000  | 0.958283000  |
| C | 6.015855000  | 5.541241000  | 3.445072000  |
| C | 5.373385000  | 6.743491000  | 3.406415000  |
| C | 5.807005000  | 7.841351000  | 2.534916000  |
| C | 6.972356000  | 7.547575000  | 1.719243000  |
| O | 5.210750000  | 8.938639000  | 2.506244000  |
| C | 7.418345000  | 2.918211000  | 3.502348000  |
| C | 7.937955000  | 2.801765000  | 4.800512000  |
| C | 7.552647000  | 1.773475000  | 5.653065000  |
| C | 6.623061000  | 0.826897000  | 5.211153000  |
| C | 6.094516000  | 0.926585000  | 3.921195000  |
| C | 6.482728000  | 1.964167000  | 3.059992000  |
| O | 6.294076000  | -0.157034000 | 6.112017000  |
| C | 5.359652000  | -1.138818000 | 5.709545000  |
| C | 5.892486000  | 2.044304000  | 1.670702000  |
| H | 11.413856000 | 1.659288000  | 0.787313000  |
| H | 9.481016000  | 1.839876000  | 2.317080000  |
| H | 10.725940000 | 5.736134000  | -0.535180000 |
| H | 5.663614000  | 4.755341000  | 4.108860000  |
| H | 4.504170000  | 6.936784000  | 4.030646000  |
| H | 7.343386000  | 8.319460000  | 1.052425000  |
| H | 8.660225000  | 3.538153000  | 5.141951000  |
| H | 7.956870000  | 1.686518000  | 6.656992000  |
| H | 5.372277000  | 0.200752000  | 3.562469000  |
| H | 5.716224000  | -1.710637000 | 4.841366000  |
| H | 4.383060000  | -0.697718000 | 5.465443000  |
| H | 5.245050000  | -1.814111000 | 6.560943000  |
| H | 5.186439000  | 1.226208000  | 1.492484000  |
| H | 6.676129000  | 1.995278000  | 0.906198000  |
| H | 5.364766000  | 2.993044000  | 1.520964000  |

**THERMAL INFORMATION:**

Sum of electronic and thermal Energies = -1110.403560  
 Sum of electronic and thermal Enthalpies = -1110.402616  
 Sum of electronic and thermal Free Energies = -1110.475068

**THERMAL INFORMATION:**

Sum of electronic and thermal Energies = -1109.887383  
 Sum of electronic and thermal Enthalpies = -1109.886439  
 Sum of electronic and thermal Free Energies = -1109.958874

**COMPOUND 6 WITH THE XANTHONE AND C9 ARYL GROUP FORCED TO BE AT 90°**

**GEOMETRY for C<sub>23</sub>H<sub>20</sub>O<sub>3</sub>**

|   |              |              |              |
|---|--------------|--------------|--------------|
| C | -1.656274000 | -3.608819000 | 0.028002000  |
| C | -3.059805000 | -3.518776000 | -0.004435000 |
| C | -0.897046000 | -2.453734000 | 0.031030000  |
| C | -1.490053000 | -1.170638000 | -0.005874000 |
| C | -3.685064000 | -2.272833000 | -0.023972000 |
| C | -2.900972000 | -1.120681000 | -0.019320000 |
| O | -3.755442000 | -4.686595000 | -0.007965000 |
| C | -0.751478000 | 0.076399000  | -0.000407000 |
| C | -1.449343000 | 1.268854000  | -0.000377000 |
| C | -2.903573000 | 1.261600000  | 0.000075000  |
| O | -3.573010000 | 0.058634000  | -0.018693000 |
| C | -0.825628000 | 2.577055000  | -0.030154000 |
| C | -1.555119000 | 3.716236000  | -0.020502000 |
| C | -3.031339000 | 3.711259000  | 0.013948000  |
| C | -3.655020000 | 2.391835000  | 0.012310000  |
| O | -3.683168000 | 4.761033000  | 0.031291000  |
| C | 0.738082000  | 0.043767000  | 0.010815000  |
| C | 1.469560000  | 0.021024000  | -1.187736000 |
| C | 2.860500000  | -0.007180000 | -1.171984000 |
| C | 3.588136000  | -0.025081000 | 0.031328000  |
| C | 2.848349000  | -0.008464000 | 1.221127000  |
| C | 1.452481000  | 0.028011000  | 1.214561000  |
| H | -1.194487000 | -4.589717000 | 0.055988000  |
| H | 0.183938000  | -2.528244000 | 0.065531000  |
| H | -4.766754000 | -2.172867000 | -0.036565000 |
| H | -4.706921000 | -4.496702000 | -0.026637000 |
| H | 0.257700000  | 2.618084000  | -0.066124000 |
| H | -1.080426000 | 4.692775000  | -0.046517000 |
| H | -4.737939000 | 2.335184000  | 0.014940000  |
| H | 0.942731000  | 0.040546000  | -2.138045000 |
| H | 3.354809000  | -0.023983000 | 2.179644000  |
| C | 5.126466000  | -0.061788000 | 0.001007000  |
| H | 3.386983000  | -0.011794000 | -2.122334000 |
| C | 5.655307000  | 1.186784000  | -0.744627000 |
| C | 5.739682000  | -0.073469000 | 1.413835000  |
| C | 5.594131000  | -1.337891000 | -0.738699000 |
| H | 0.911890000  | 0.036312000  | 2.157023000  |
| H | 5.342954000  | 2.107558000  | -0.239081000 |
| H | 5.291334000  | 1.231919000  | -1.776385000 |
| H | 6.751328000  | 1.173005000  | -0.778701000 |
| H | 5.428689000  | -0.954188000 | 1.987245000  |
| H | 5.467968000  | 0.821588000  | 1.984870000  |
| H | 6.832494000  | -0.097672000 | 1.340248000  |
| H | 5.225639000  | -1.370569000 | -1.769259000 |
| H | 5.239654000  | -2.239983000 | -0.227045000 |
| H | 6.689510000  | -1.376643000 | -0.775554000 |

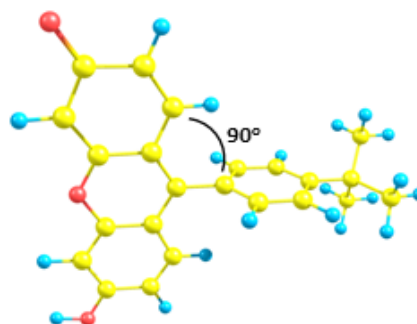

**THERMAL INFORMATION:**

Sum of electronic and thermal Energies = -1113.765579

Sum of electronic and thermal Enthalpies = -1113.764634

Sum of electronic and thermal Free Energies = -  
1113.836503

## Photophysics.

### Absorption spectroscopy

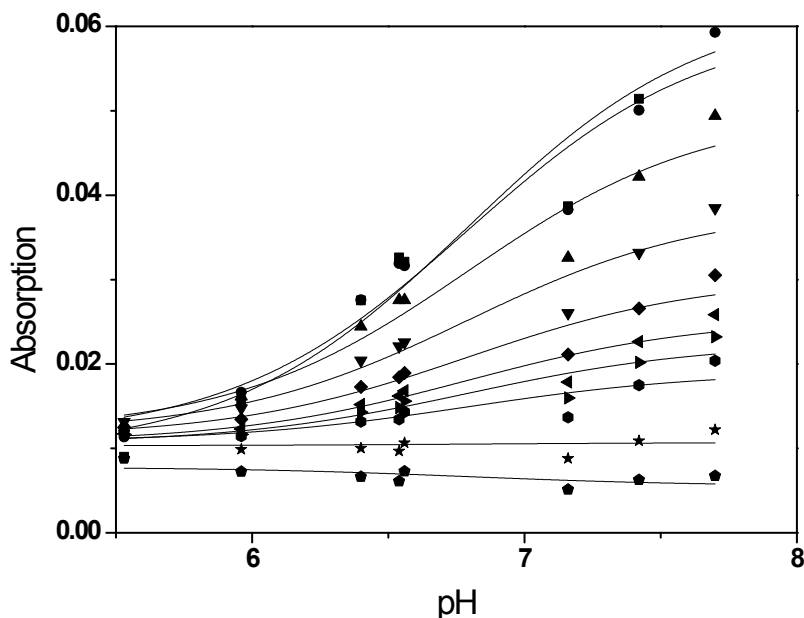

**Figure S1.** Global fitting of the  $A$  vs. pH curves of GG solutions in phosphate buffer 0.005 M. The wavelengths shown are 500 (■), 495 (●), 490 (▲), 485 (▼), 480(◆), 470 (◄), 465 (►), 460 (◆), 455 (★) and 450 nm (●).

The absorbance  $A$  of the aqueous solutions of GG depends on pH according to Beer's law and the simple acid-base equilibrium theory. To analyze the experimental absorbance vs pH, we implemented a global nonlinear least-squares curve fitting method. Assuming that the neutral/anion system follows Beer's law, at any wavelength  $\lambda_{\text{abs}}$  and pH, the absorbance  $A$  is given by the expression:

$$A(\text{pH}, \lambda_{\text{abs}}) = C^{\text{GG}} \left( \sum_i \alpha_i(\text{pH}, \text{pK}_a^{\text{app}}) \varepsilon_i(\lambda_{\text{abs}}) \right) d \quad (1)$$

where  $C^{\text{GG}}$  is the total concentration of **GG**,  $d$  is the optical path length,  $\varepsilon_i(\lambda_{\text{abs}})$  is the molar absorption coefficient of the  $i$ th prototropic form of **GG** depending on wavelength, and  $\alpha_i(\text{pH}, \text{p}K_{\text{a}}^{\text{app}})$  is the fraction of **GG** in the  $i$ th prototropic form. The values of  $\alpha_i$  depend on both pH and the apparent ground-state acidity constant ( $\text{p}K_{\text{a}}^{\text{app}}$  value) according to the simple acid-base equilibrium equations.

The nonlinear global fitting of the entire  $A$  vs pH vs  $\lambda_{\text{abs}}$  surface to eq 1 and the corresponding acid-base equilibrium equations allows the determination of the molar absorption coefficients  $\varepsilon_i(\lambda_{\text{abs}})$  and  $\text{p}K_{\text{a}}^{\text{app}}$ . In this global fitting, the apparent  $\text{p}K_{\text{a}}^{\text{app}}$  was a linked parameter over the whole surface, while  $\varepsilon_i(\lambda_{\text{abs}})$  were locally adjustable parameters at each wavelength for each species. (Figure 5)

### *Emission Spectroscopy*

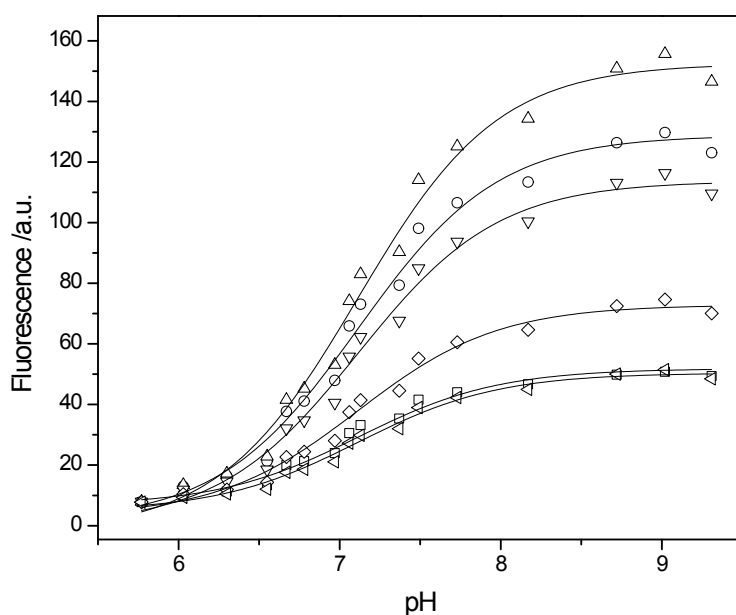

**Figure S2.** Plot of the experimental steady-state fluorescence(  $\lambda_{ex}$  =485 nm and  $\lambda_{em}$  500 (■), 510 (○), 520 (Δ), 530 (♦) 540 (✱) and 550nm (✧)) versus pH of  $7 \times 10^{-6}$  M GG aqueous solutions at pH values between 5.5 and 9 in phosphate buffer 0.005 M. Equation 2 was fitted to these experimental values. The lines represent the best fitting curves.

Assuming that there is no excited-state proton exchange between neutral and anion in the absence of phosphate buffer, the value of the acidity constant of GG was obtained by means the following equation:

$$I = C^{dye} K_a [\phi_N \alpha_N \epsilon_N + \phi_A \alpha_A \epsilon_A] \quad (2)$$

in which  $\phi_N$  and  $\phi_A$  represent the quantum yield of the neutral and anion forms, respectively. The experimental results of Figure 6 were fitted to equation 2 by non-linear least-squares estimation and very good fit parameters were obtained ( $r^2 = 0.998$ ), with a  $pK_a$  value of  $7.26 \pm 0.019$ .  $\phi_1$  and  $\phi_2$  were floating values during the fitting.

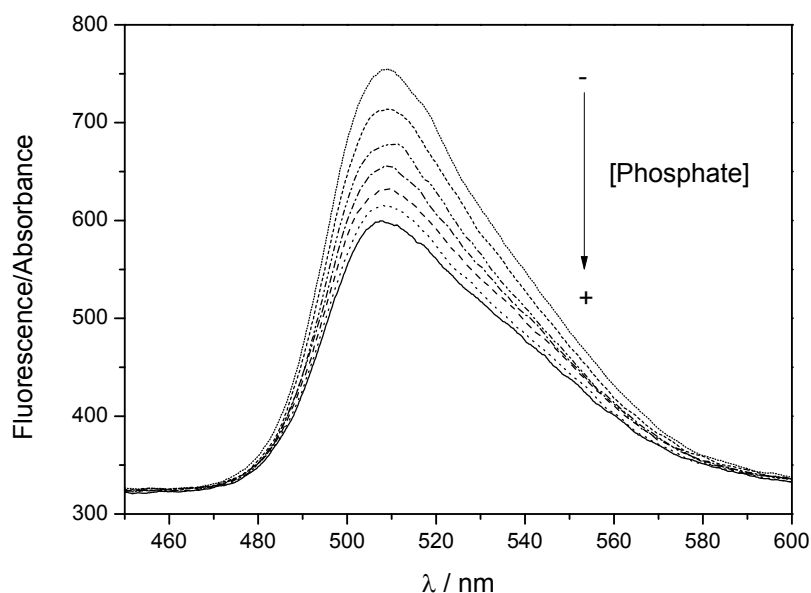

**Figure S3.** Steady-state emission spectra of GG at pH 7.00 and different [Phosphate] (0.05 to 0.40 M).

*Quantum yield*



Quantum yield values from steady-state fluorescence measurements were calculated for the anion forms using fluorescein in 0.1 M NaOH as a reference ( $\phi_{\text{fluor}} = 0.95$ ). The quantum yields of the neutral forms were obtained from the fit of equation 1 to the experimental data once obtained the values of  $\phi_{\text{A}}$ . The recovered quantum yields are 0.97 and 0.10 to anion and neutral form respectively.
